# Supplementary material for: Properdin Is a Modulator of Tumour Immunity in a Syngeneic Mouse Melanoma Model
Source: PubMed Central journal article supplement (PMC7909514; doi:10.3390/medicina57020085), 2021-01-21
Supplement: medicina-57-00085-s001.pdf [file medicina-57-00085-s001.pdf]

## Supplementary results

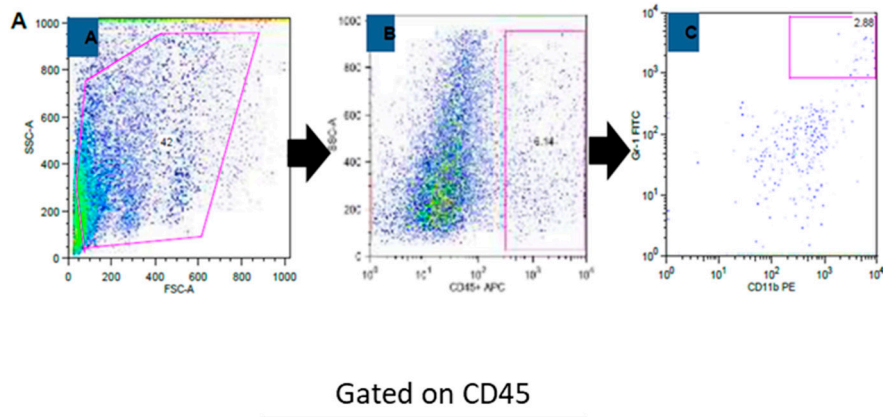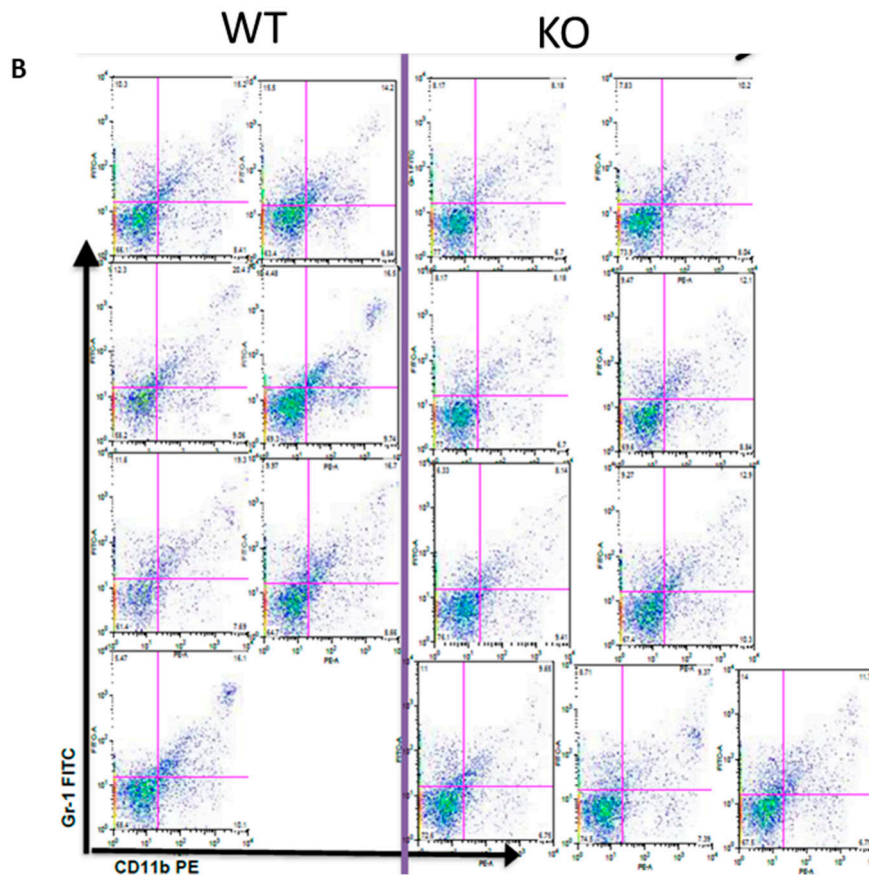

**Supplementary Figure S1.** CD45<sup>+</sup> CD11b<sup>+</sup> Gr-1<sup>+</sup> cells from wild type and KO derived splenocytes. Representative gating (A) and flow cytometry plots of splenic cell suspensions (B) analysed for the proportion of CD45<sup>+</sup> CD11b<sup>+</sup> Gr-1<sup>+</sup> cells from properdin wildtype (PropWT) and deficient (PropKO) mice.

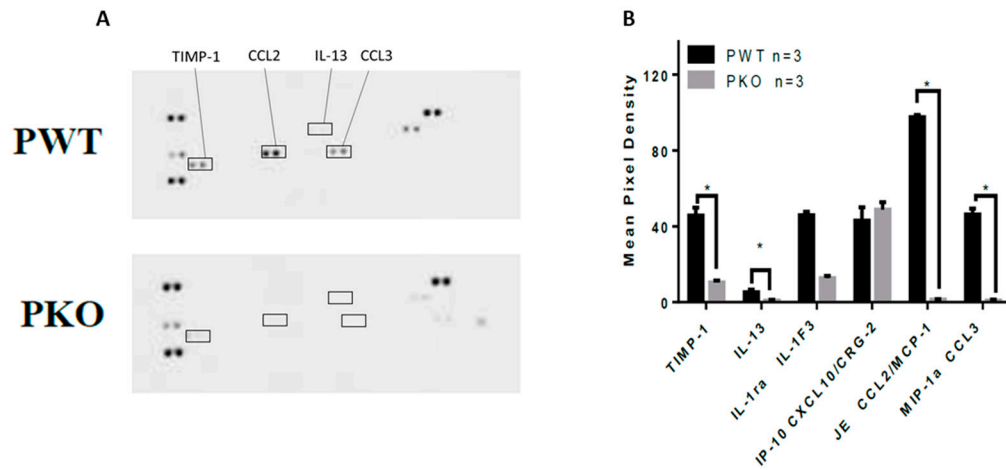

**Supplementary Figure S2.** Cytokine array analysis. Representative mouse cytokine arrays (A) for tumour lysates of wildtype (PropWT) and deficient (PropKO) mice. Three tumours of comparable sizes from each genotype were pooled and extracted protein was analysed using Mouse Cytokine Array (R&D Systems). Reactivities were quantified densitometrically (B).
